# Supplementary material for: Ionic conduction in ammonia functionalised closo-dodecaborates MB12H11NH3 (M = Li and Na)
Source: Royal Society of Chemistry journal article supplement (doi:10.1039/d4dt00801d), 2024-01-01
Supplement: d4dt00801d1.pdf [file d4dt00801d1.pdf]

## Electronic Supplementary Information

### **Ionic conduction in ammonia functionalised closo-dodecaborates $MB_{12}H_{11}NH_3$ (M = Li and Na)**

Steffen R. H. Jensen<sup>a,b</sup>, Mathias Jørgensen<sup>b</sup>, Thi Phuong Thao Nguyen<sup>a</sup>, Greg Nolan<sup>a</sup>, Craig E. Buckley<sup>a</sup>, Torben R. Jensen<sup>b\*</sup> and Mark Paskevicius<sup>a\*</sup>

<sup>a</sup> Department of Physics and Astronomy, Institute for Energy Transitions, Curtin University, GPO Box U1987, Perth, WA 6845, Australia.

<sup>b</sup> Department of Chemistry, Interdisciplinary Nanoscience Center (iNANO), Aarhus University, Langelandsgade 140, DK-8000 Aarhus, Denmark.

\* Corresponding authors

Torben R. Jensen (trj@chem.au.dk) and Mark Paskevicius (mark.paskevicius@gmail.com)

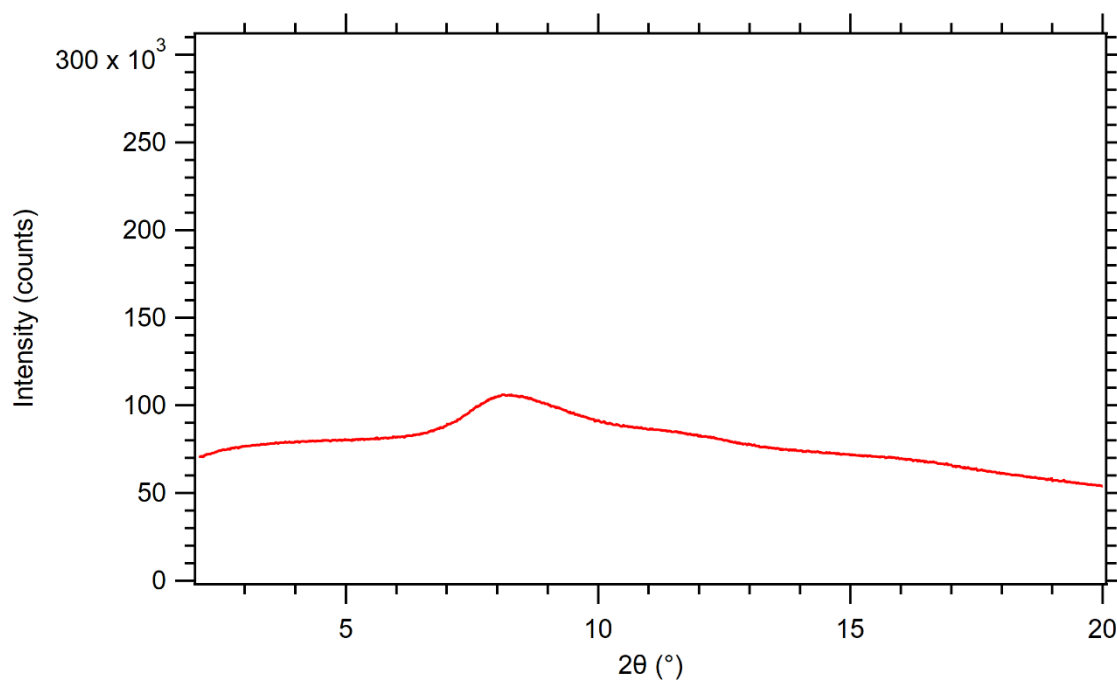

**Fig. S1** XRD data for solvated  $\text{LiB}_{12}\text{H}_{11}\text{NH}_3\cdot\text{MeCN}$  after synthesis (before drying).  $\lambda = 0.824958 \text{ \AA}$ .

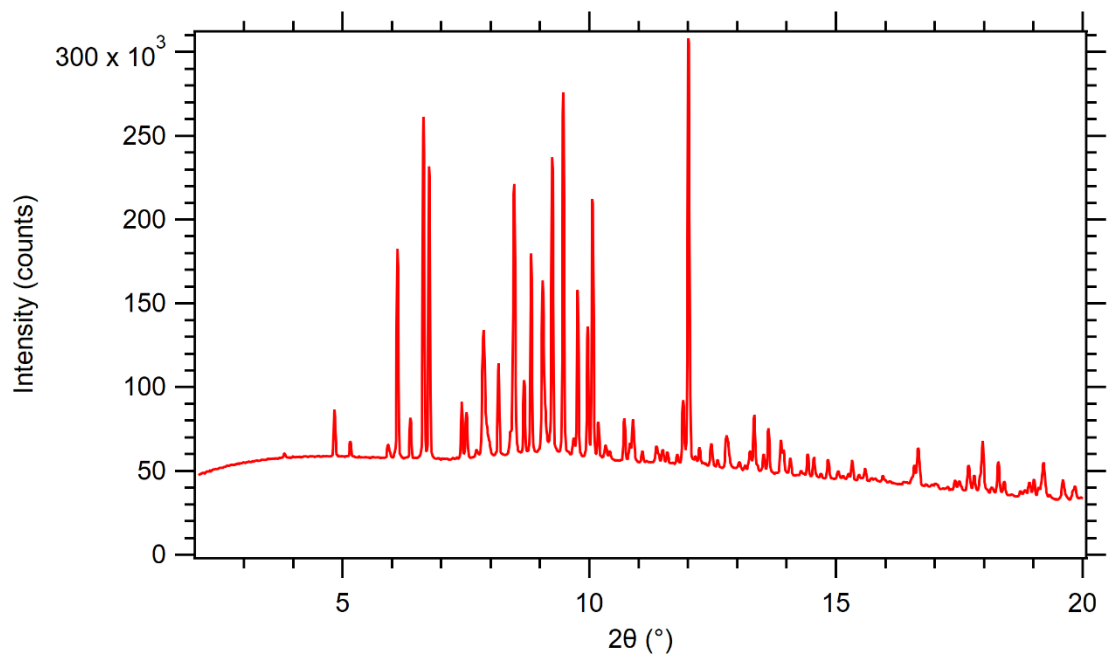

**Fig. S2** XRD data for solvated  $\text{NaB}_{12}\text{H}_{11}\text{NH}_3\cdot 4\text{H}_2\text{O}$  after synthesis (before drying).  $\lambda = 0.824958 \text{ \AA}$ .

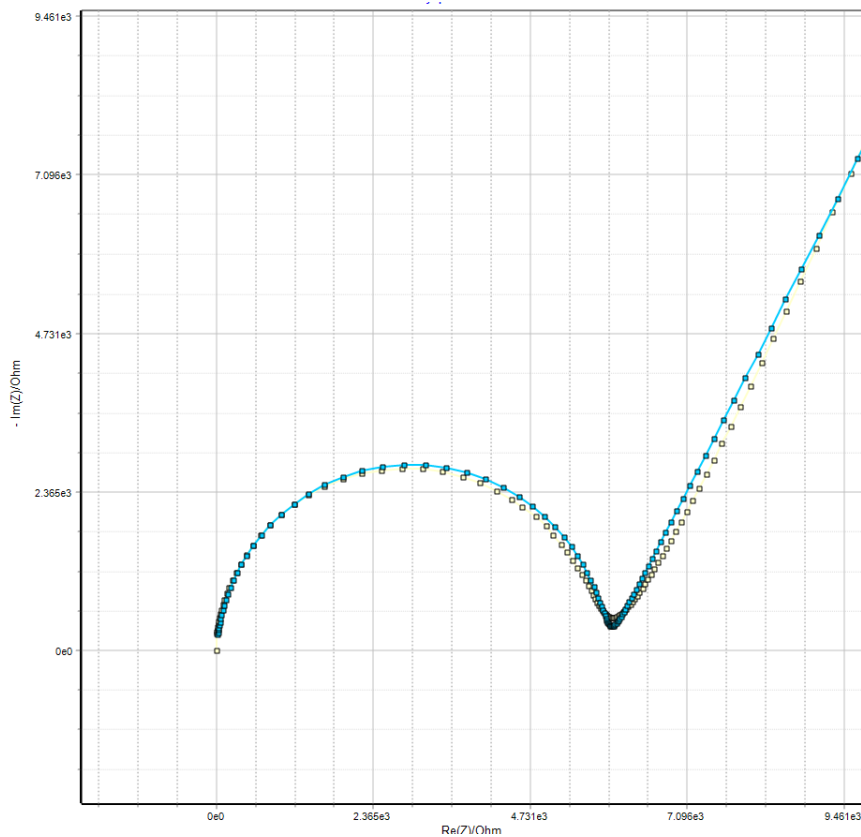

**Fig. S3** Example electrochemical impedance spectroscopy Nyquist plot for  $\text{LiB}_{12}\text{H}_{11}\text{NH}_3$  at  $110^\circ\text{C}$  (yellow) and the fit (blue) using a  $(Q/R + W)$  equivalent circuit with constant phase element ( $Q$ ), resistor ( $R$ ) and Warburg element ( $W$ ).

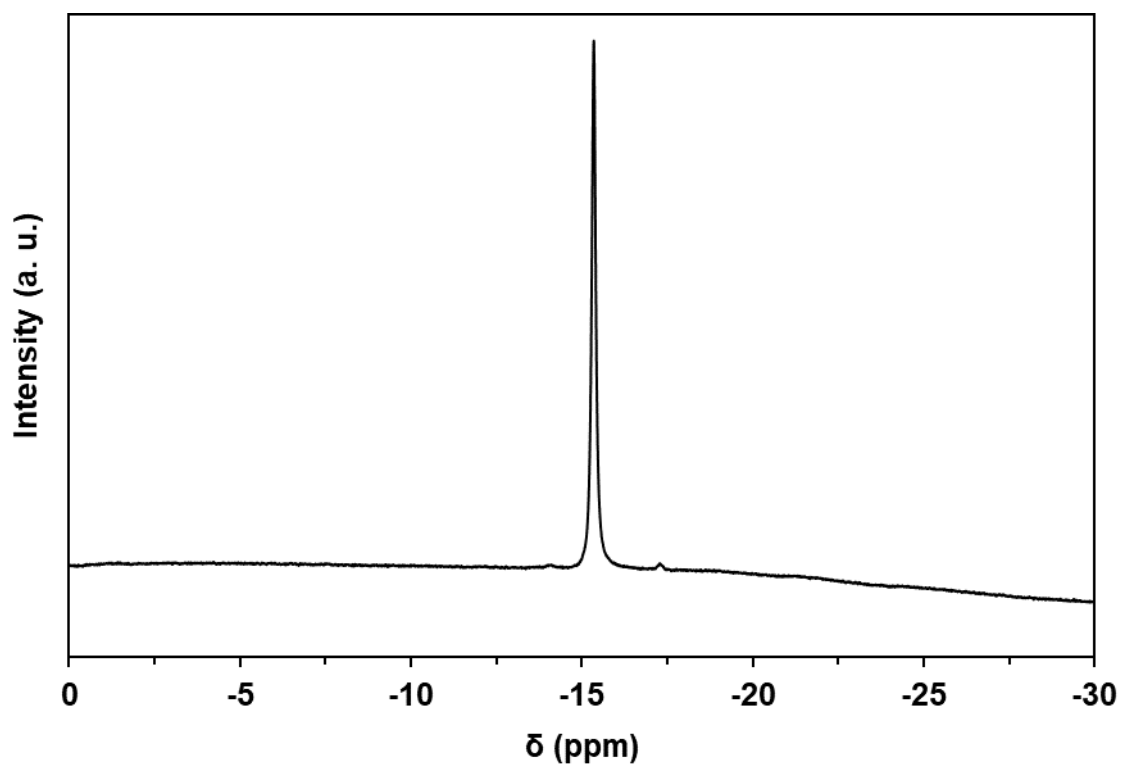

**Fig. S4**  $^{11}\text{B}\{^1\text{H}\}$  NMR spectrum of the  $\text{NaB}_{12}\text{H}_{12}$  precursor in  $\text{D}_2\text{O}$ .

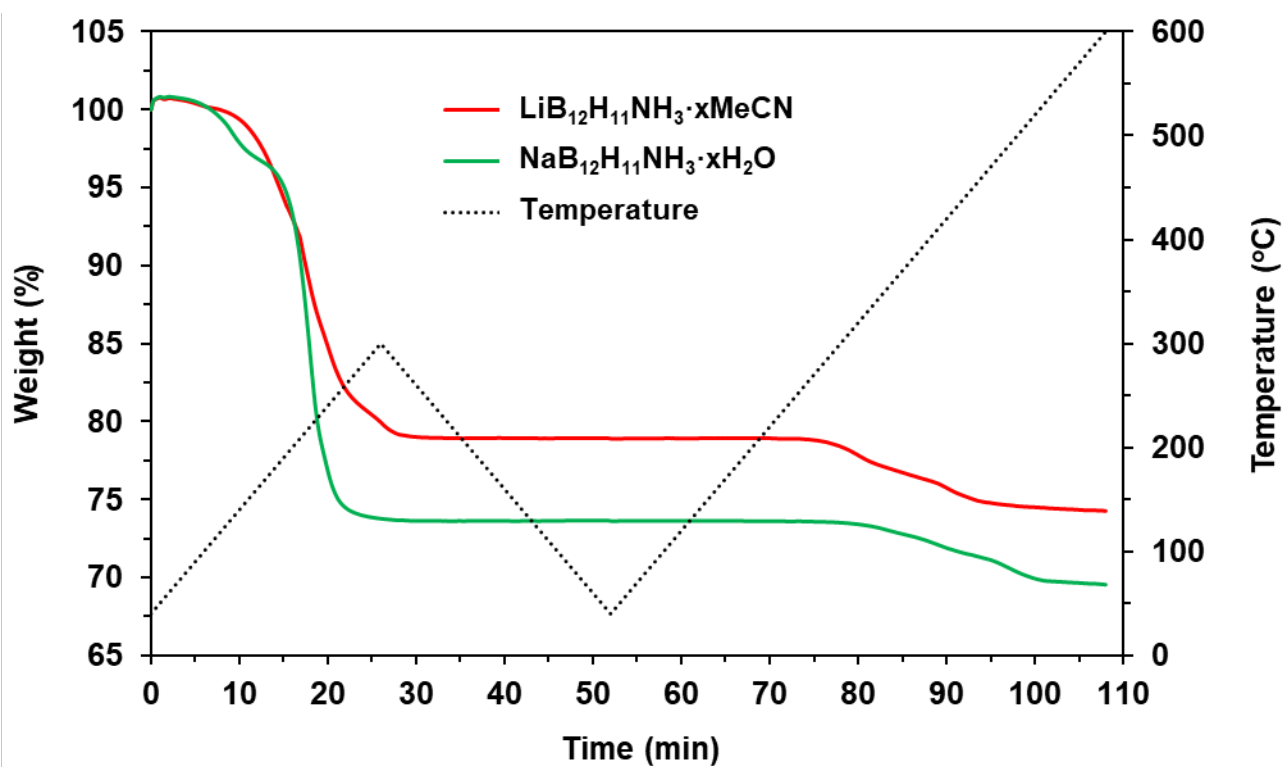

**Fig. S5** Thermogravimetric plots for  $\text{LiB}_{12}\text{H}_{11}\text{NH}_3 \cdot x\text{MeCN}$  and  $\text{NaB}_{12}\text{H}_{11}\text{NH}_3 \cdot x\text{H}_2\text{O}$  heated from RT to 300 °C then cooled to 40 °C and finally re-heated to 600 °C in a  $40 \text{ mLmin}^{-1}$  flow of Ar at 10 °C/min.

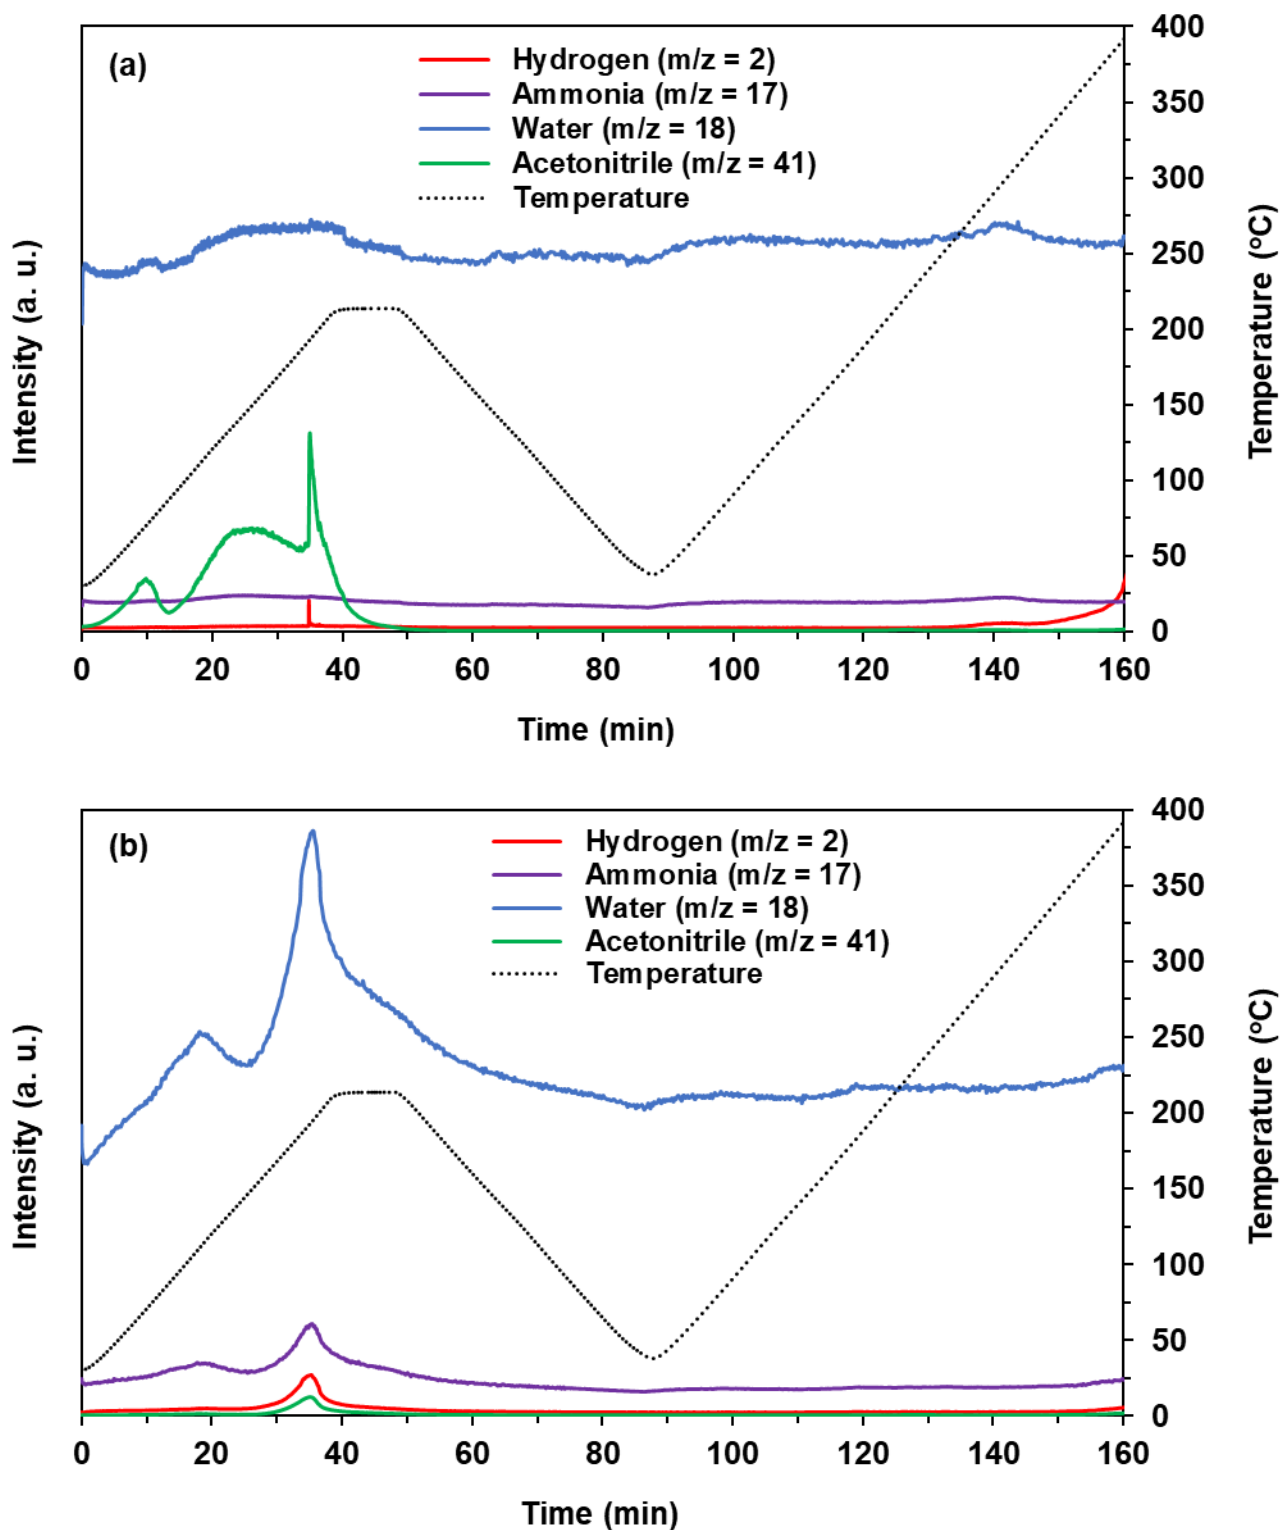

**Fig. S6** TPD plots for (a)  $\text{LiB}_{12}\text{H}_{11}\text{NH}_3 \cdot x\text{MeCN}$  and (b)  $\text{NaB}_{12}\text{H}_{11}\text{NH}_3 \cdot x\text{H}_2\text{O}$ . Temperature program: heating from RT to 220 °C ( $\Delta T/\Delta t = 5 \text{ }^\circ\text{Cmin}^{-1}$ ), isothermally holding at 220 °C for 1 h, cooling to RT, and heating again to 400 °C ( $\Delta T/\Delta t = 5 \text{ }^\circ\text{Cmin}^{-1}$ ). The signals for  $\text{NaB}_{12}\text{H}_{11}\text{NH}_3 \cdot x\text{H}_2\text{O}$  at 35 minutes for  $m/z = 2$  and 17 are likely related to water fractionation in the mass spectrometer.

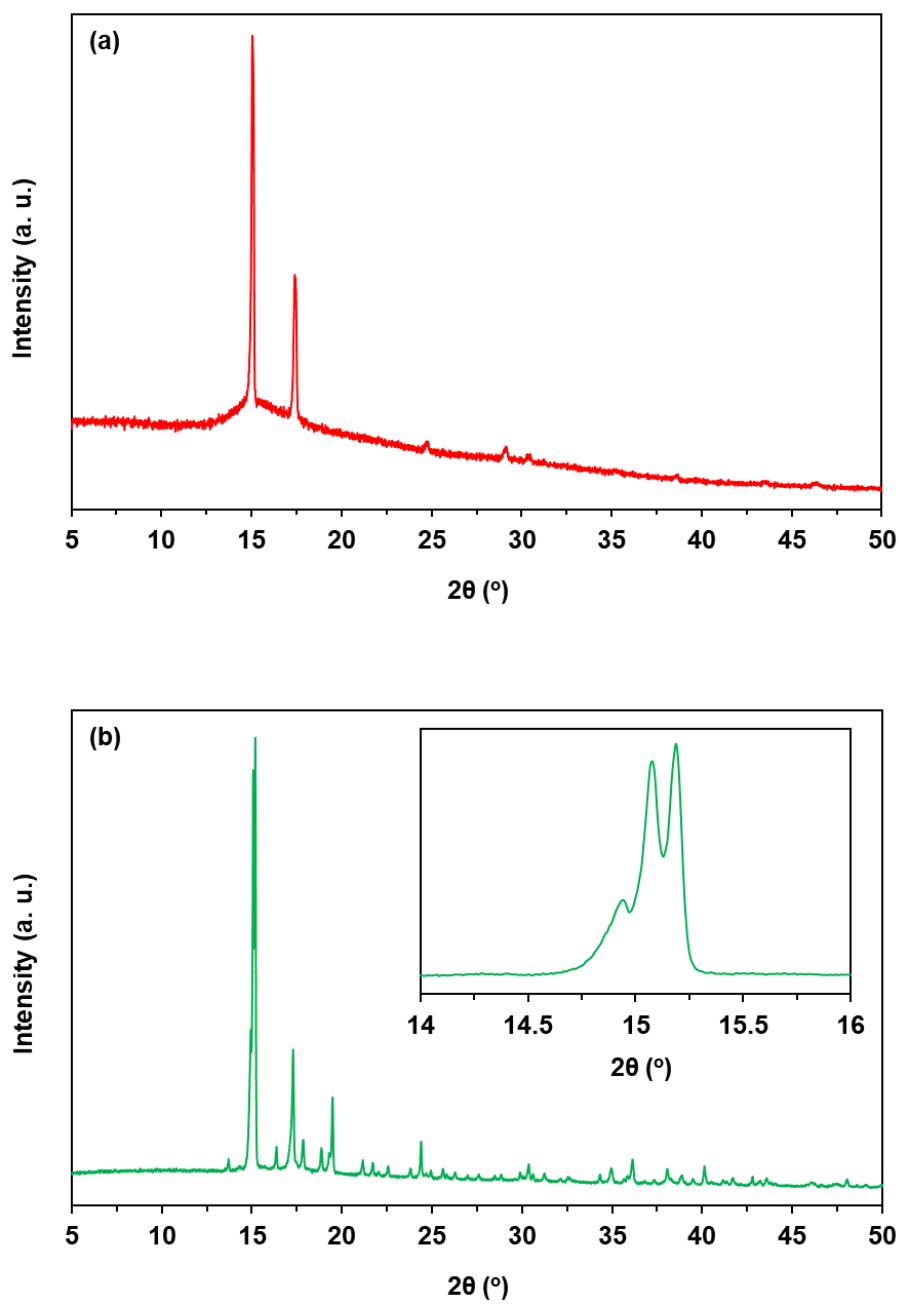

**Fig. S7** XRD patterns of (a)  $\text{LiB}_{12}\text{H}_{11}\text{NH}_3$  and (b)  $\text{NaB}_{12}\text{H}_{11}\text{NH}_3$  at RT ( $\lambda = 1.54060 \text{ \AA}$ ).

**Table S1** Atomic coordinates for  $\alpha$ -NaB<sub>12</sub>H<sub>11</sub>NH<sub>3</sub> in  $P2_12_12_1$  ( $a = 7.1972(3)$  Å,  $b = 9.9225(4)$  Å,  $c = 14.5556(5)$  Å, and  $V = 1038.19$  Å<sup>3</sup>).

| Name | Atom | $x$       | $y$      | $z$       |
|------|------|-----------|----------|-----------|
| B1   | B    | 0.083674  | 1.091983 | 0.125373  |
| B2   | B    | 0.317307  | 0.910132 | 0.035607  |
| B3   | B    | 0.446004  | 0.899962 | 0.125812  |
| B4   | B    | 0.219115  | 1.081069 | 0.215647  |
| B5   | B    | 0.090674  | 0.939005 | 0.071653  |
| B6   | B    | 0.223529  | 1.069163 | 0.030440  |
| B7   | B    | 0.438638  | 1.054724 | 0.181270  |
| B8   | B    | 0.308428  | 0.922975 | 0.221984  |
| B9   | B    | 0.444761  | 1.050055 | 0.066006  |
| B10  | B    | 0.088670  | 0.943867 | 0.184933  |
| B11  | B    | 0.229939  | 0.832731 | 0.131668  |
| B12  | B    | 0.303679  | 1.160967 | 0.119196  |
| N13  | N    | -0.097088 | 1.192367 | 0.130071  |
| H14  | H    | 0.363236  | 0.843547 | -0.029550 |
| H15  | H    | 0.583923  | 0.823510 | 0.120187  |
| H16  | H    | 0.184284  | 1.143193 | 0.280134  |
| H17  | H    | -0.033967 | 0.900349 | 0.030299  |
| H18  | H    | 0.195675  | 1.117917 | -0.041169 |
| H19  | H    | 0.561703  | 1.099626 | 0.226027  |
| H20  | H    | 0.340518  | 0.872810 | 0.294518  |
| H21  | H    | 0.578936  | 1.088863 | 0.025622  |
| H22  | H    | -0.037544 | 0.902957 | 0.228729  |
| H23  | H    | 0.207572  | 0.711737 | 0.138838  |
| H24  | H    | 0.330684  | 1.272477 | 0.113484  |
| Na   | Na   | 0.015603  | 0.878269 | 0.881189  |



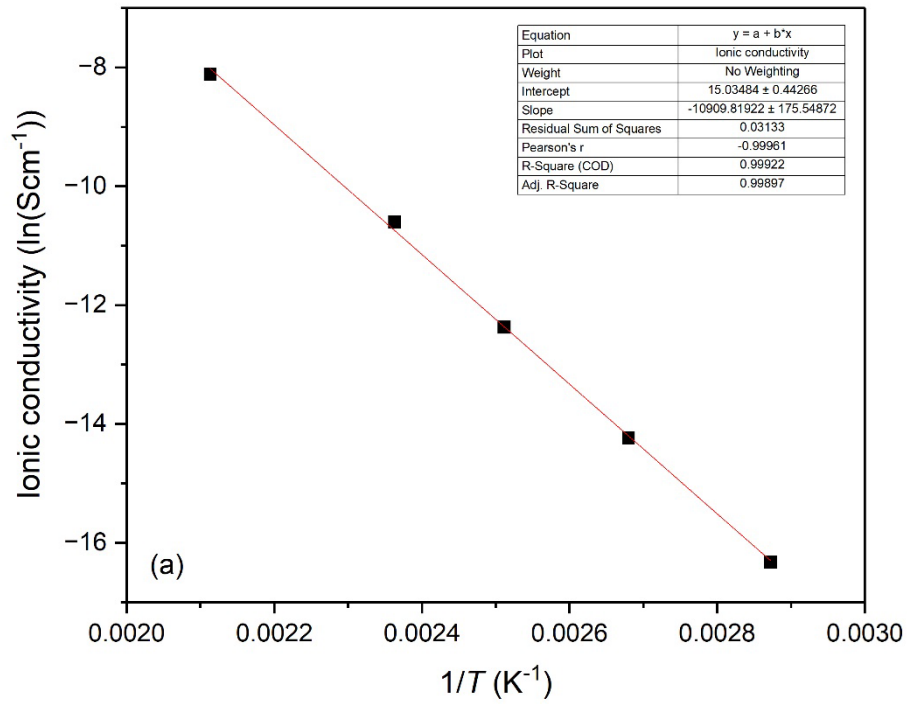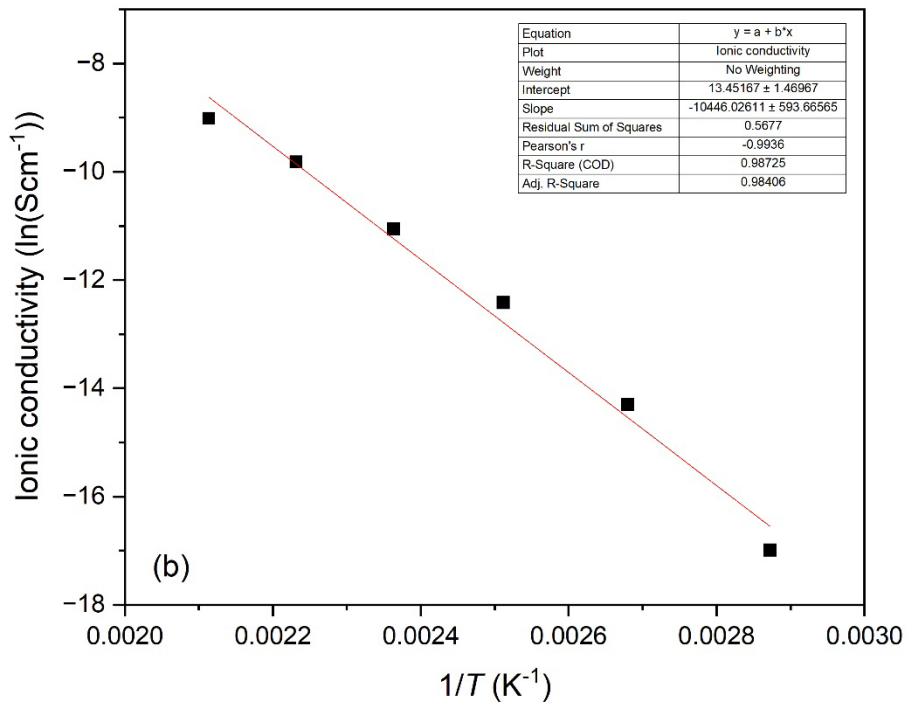

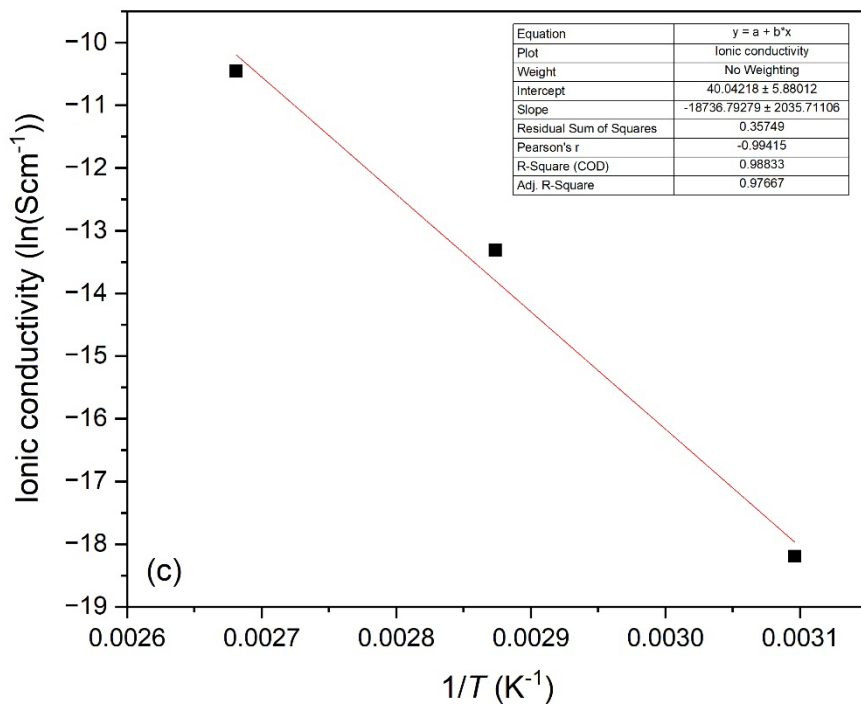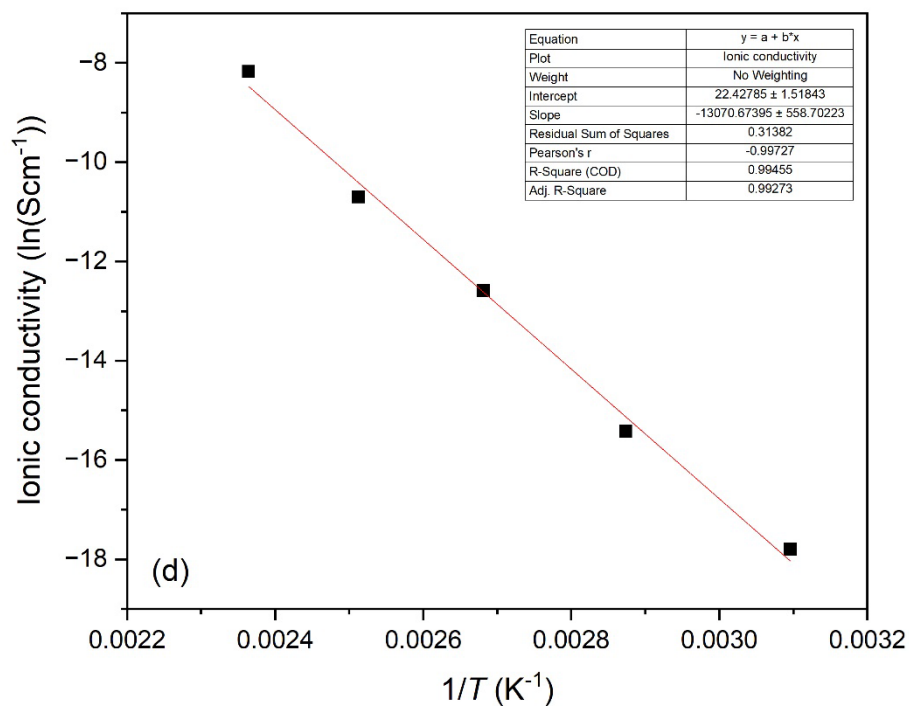

**Fig. S8** Arrhenius plots for the ionic conductivity of dehydrated (a)  $\text{LiB}_{12}\text{H}_{11}\text{NH}_3$  and (b)  $\text{NaB}_{12}\text{H}_{11}\text{NH}_3$ , and hydrated (c)  $\text{LiB}_{12}\text{H}_{11}\text{NH}_3$  and (d)  $\text{NaB}_{12}\text{H}_{11}\text{NH}_3$ .
